# Supplementary material
Source: PubMed Central journal article supplement (PMC5140770)
Supplement: NIHMS776562-supplement-1.pdf [file NIHMS776562-supplement-1.pdf]

# Supplementary Figure 1-2 and Table 1

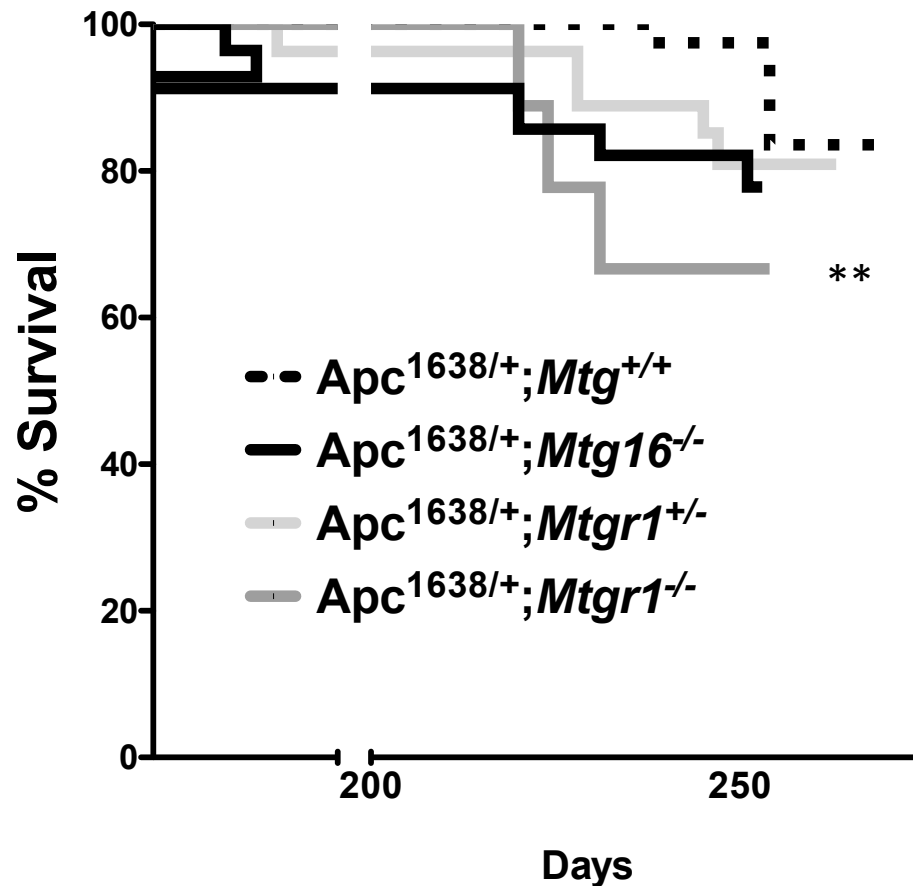

**Supplementary Figure 1.** Survival curves of  $Apc^{1638/+};Mtg^{+/+}$  (n=36),  $Apc^{1638/+};Mtg16^{-/-}$  (n=19),  $Apc^{1638/+};Mtgr1^{+/-}$  (n=25),  $Apc^{1638/+};Mtgr1^{-/-}$  (n=7) mice. \*\*  $P < 0.01$ , Log-rank Mantel-Cox Test

**a***Apc*<sup>1638/+</sup>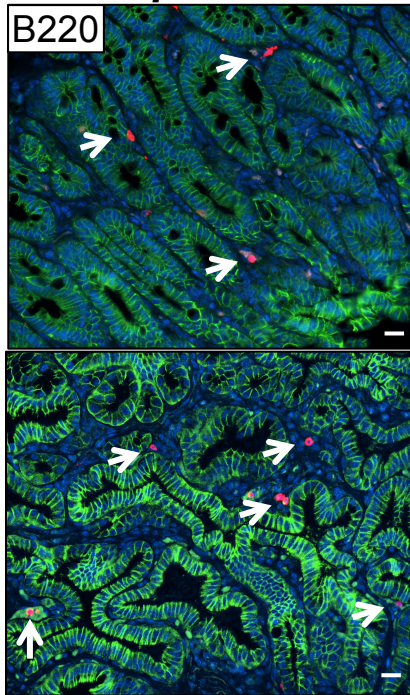**WT***Mtgr1*<sup>-/-</sup>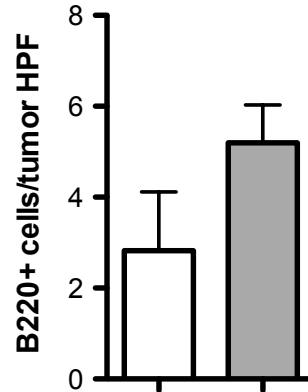

|                            |     |     |
|----------------------------|-----|-----|
| <i>Apc</i> <sup>1638</sup> | +/- | +/- |
| <i>Mtgr1</i>               | +/+ | -/- |

**b***Apc*<sup>1638/+</sup>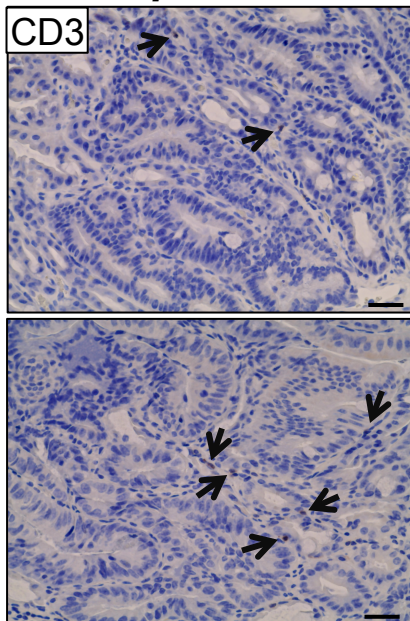**WT***Mtgr1*<sup>-/-</sup>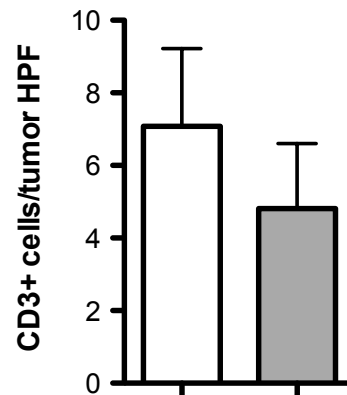

|                            |     |     |
|----------------------------|-----|-----|
| <i>Apc</i> <sup>1638</sup> | +/- | +/- |
| <i>Mtgr1</i>               | +/+ | -/- |

**Supplementary Figure 2.**  
**Intratumoral immune cell infiltration in *Apc*<sup>1638/+</sup>;*Mtgr1*<sup>+/-</sup> and *Apc*<sup>1638/+</sup>;*Mtgr1*<sup>-/-</sup> tumors. (A)** B220 immunofluorescence. Red – B220, Green – E-Cadherin, Blue – DAPI and (B) CD3 IHC immunohistochemical assessment per tumor high power field. A minimum of 5 HPF per animal were scored. Data is presented as average number of positive staining cells per tumor HPF. Size standard= 20 microns. Arrows indicate positive cells.

## Notch and Wnt Signaling Targets

|        |        |
|--------|--------|
| Arrb1  | Ep400  |
| Ctbp2  | Gnb4   |
| Plcb2  | Arrb2  |
| Prcka  | Chd1   |
| Ctnna3 | Plcb4  |
| Ppp2cb | Bcl9   |
| Tcf712 | Nfatc1 |
| Tle3   | Ppp3ca |
| Btrc   | Hes1   |
| Gna15  | Prkci  |
| Gnaq   | Prkcq  |
| Cdh23  | Siah1b |

**Supplementary Figure 3. MTGR1 and MTG16 regulates specific genomic subsets.** Wnt and Notch targets regulated by MTGR1 identified by PANTHER.

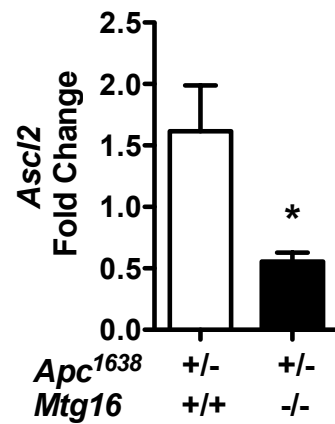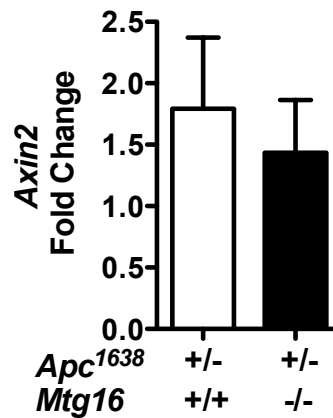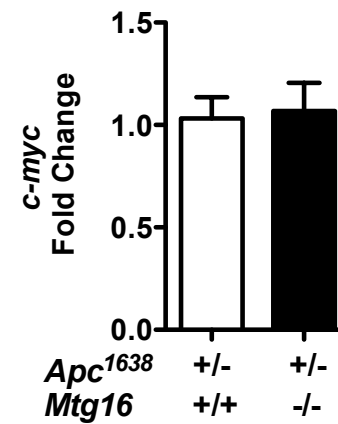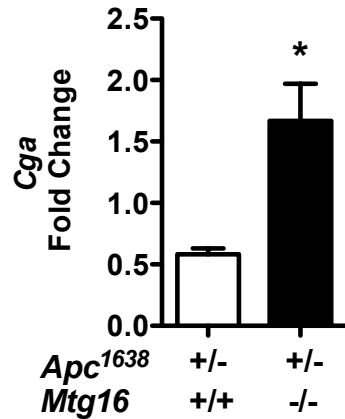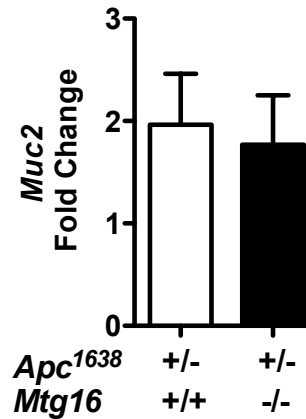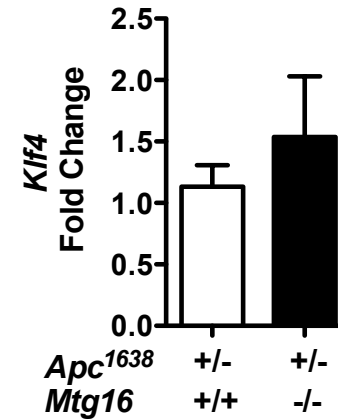

**Supplementary Figure 4. Wnt and Notch signaling in *Mtg16*<sup>-/-</sup> tumors.** qPCR of Wnt target genes *Ascl2*, *Axin2*, and *c-Myc* and Notch target genes *Cga*, *Muc2*, and *Klf4* in *Apc*<sup>1638/+</sup>;*Mtg*<sup>+/+</sup> (n=4) and *Apc*<sup>1638/+</sup>;*Mtg16*<sup>-/-</sup> (n=4) tumors. Data is presented as mean  $\pm$  SEM. Student's t-test. \*P<0.05

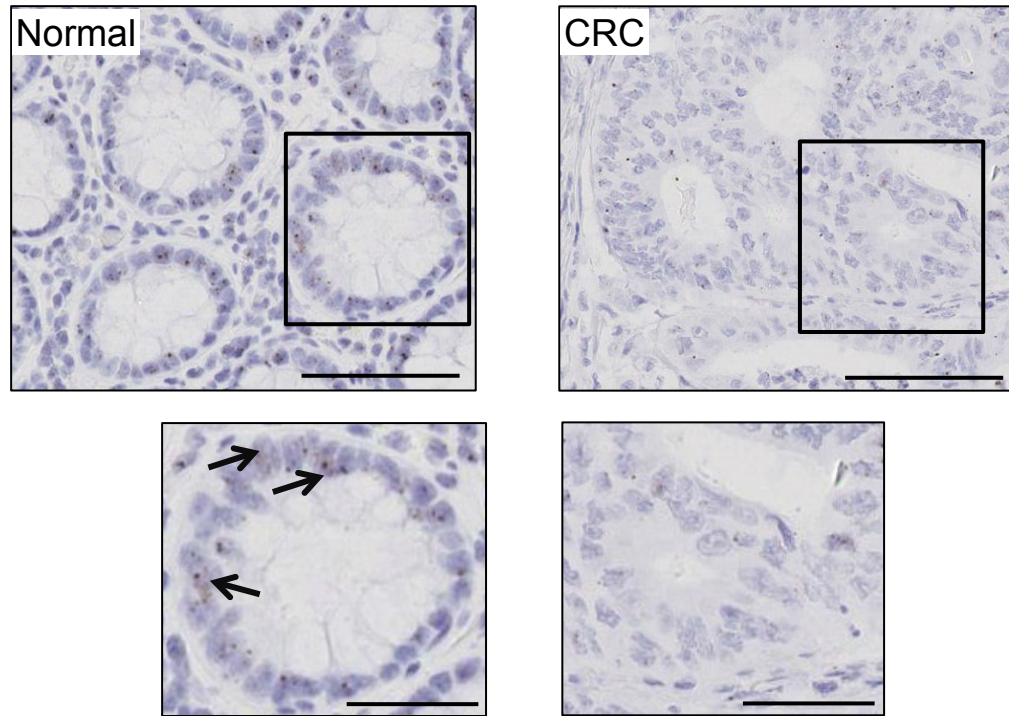

**Supplementary Figure 5. *Mtgr1* RNA expression in normal colon and colorectal cancers.** Size standard is 100 microns; inset size standard is 50 microns.

| Gene   | Spearman Coefficient | P value  |
|--------|----------------------|----------|
| Hes1   | -0.30                | P<0.001  |
| Notch2 | -0.18                | P<0.01   |
| Notch3 | -0.17                | P<0.01   |
| Notch4 | -0.25                | P<0.001  |
| Cttnb1 | -0.19                | P<0.01   |
| Myc    | -0.18                | P<0.01   |
| Atoh1  | 0.186                | P<0.01   |
| Sox9   | 0.31                 | P<0.0001 |

**Supplementary Figure 6. *Mtgr1* is inversely correlated with Wnt and Notch activity in carcinomas.** Correlations between Wnt or Notch transcriptional targets and *Mtgr1* expression in the Vanderbilt/Moffitt Cancer Center expression array dataset.

|                                          | <b>CRC (n=102)</b>               | <b>Normal (n=25)</b>         |
|------------------------------------------|----------------------------------|------------------------------|
| <b>Average Age (<math>\pm</math> sd)</b> | 64 $\pm$ 14.9                    | 48 $\pm$ 21.2                |
| <b>Gender</b>                            | Female (n=53)<br>Male (n=49)     | Male (n=14)<br>Female (n=11) |
| <b>Average BMI</b>                       | n/a                              | 24.5 $\pm$ 2.8               |
| <b>Race</b>                              | White (n=83)<br>Black (n=19)     | White (n=23)<br>Black (n=2)  |
| <b>Grade if applicable</b>               | 1 (n=14)<br>2 (n=62)<br>3 (n=26) | n/a                          |

**Supplementary Table 1.** Clinical characteristics of patient samples.
